# Supplementary material for: ReCodLiver0.9: Overcoming Challenges in Genome-Scale Metabolic Reconstruction of a Non-model Species
Source: PubMed Central journal article supplement (PMC7726423; doi:10.3389/fmolb.2020.591406), 2020-11-26
Supplement: Table_1.pdf [file Table_1.pdf]

## Supplementary Material

**Table S1. Summary of reconstruction tools for GEMs of non-model species**

| <b>Tool</b>       | <b>Programming Language</b> | <b>Gap-filling</b> | <b>Databases used for reactions</b> | <b>References</b> |
|-------------------|-----------------------------|--------------------|-------------------------------------|-------------------|
| <i>CarveMe</i>    | Python                      | Yes                | BIGG Models                         | (1)               |
| <i>FAME</i>       | Python                      | No                 | KEGG                                | (2)               |
| <i>MetaDraft</i>  | Python                      | No                 | BIGG Models                         | (3)               |
| <i>Model SEED</i> | Web                         | Yes                | In-house reaction database          | (4)               |
| <i>RAVEN2.0</i>   | Matlab                      | Yes                | KEGG, MetaCyc                       | (5)               |

## REFERENCES

- [1] Machado D, Andrejev S, Tramontano M, Patil KR. Fast automated reconstruction of genome-scale metabolic models for microbial species and communities. *Nucleic acids research*, 2018;46(15):7542–7553.
- [2] Boele J, Olivier BG, Teusink B. FAME, the flux analysis and modeling environment. *BMC systems biology*, 2012;6(1):8.
- [3] Hanemaaijer M, Olivier BG, Röling WF, Bruggeman FJ, Teusink B. Model-based quantification of metabolic interactions from dynamic microbial-community data. *PloS one*, 2017;12(3).
- [4] Henry CS, DeJongh M, Best AA, Frybarger PM, Linsay B, Stevens RL. High-throughput generation, optimization and analysis of genome-scale metabolic models. *Nature biotechnology*, 2010;28(9):977.
- [5] Wang H, Marcišauskas S, Sánchez BJ, Domenzain I, Hermansson D, Agren R, Nielsen J, Kerkhoven EJ. RAVEN 2.0: A versatile toolbox for metabolic network reconstruction and a case study on *Streptomyces coelicolor*. *PLoS computational biology*, 2018;14(10):e1006541.
